# Supplementary material for: Laser-assisted fabrication of flexible monofilament fiber supercapacitors
Source: Royal Society of Chemistry journal article supplement (doi:10.1039/d0ta10283k), 2021-01-01
Supplement: d0ta10283k2.pdf [file d0ta10283k2.pdf]

## Supplementary Material

### Laser-Assisted Fabrication of Flexible Monofilament Supercapacitor

Phuong Thi Nguyen,<sup>1</sup> Jina Jang,<sup>1</sup> Yoonjae Lee,<sup>1</sup> Seung Tae Choi,<sup>2</sup> Jung Bin In<sup>1,3,\*</sup>

<sup>1</sup>Soft Energy Systems and Laser Applications Laboratory, School of Mechanical Engineering, Chung-Ang University, Seoul, 06974, Republic of Korea

<sup>2</sup>Functional Materials and Applied Mechanics Laboratory, School of Mechanical Engineering, Chung-Ang University, Seoul, 06974, Republic of Korea

<sup>3</sup>Department of Intelligent Energy and Industry, Chung-Ang University, Seoul 06974, Republic of Korea

---

\* Corresponding author. E-mail: jbin@cau.ac.kr (J.B. In)

### ***Comparison of laser sintering and hotplate sintering***

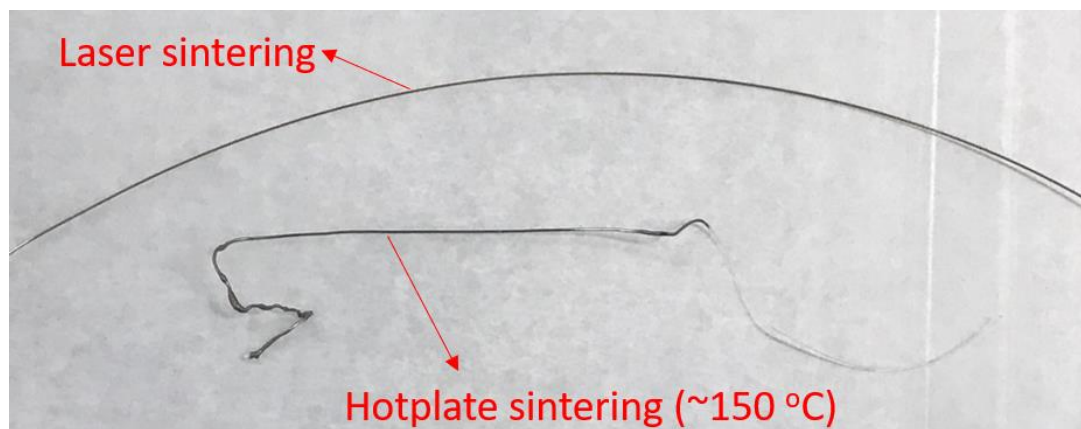

**Figure S1.** Digital images of AgNP-coated fibers sintered using a 532 nm laser and a hotplate at ~150 °C.

### ***EDS elemental maps of the AgNP/AgNW/Au-coated fiber***

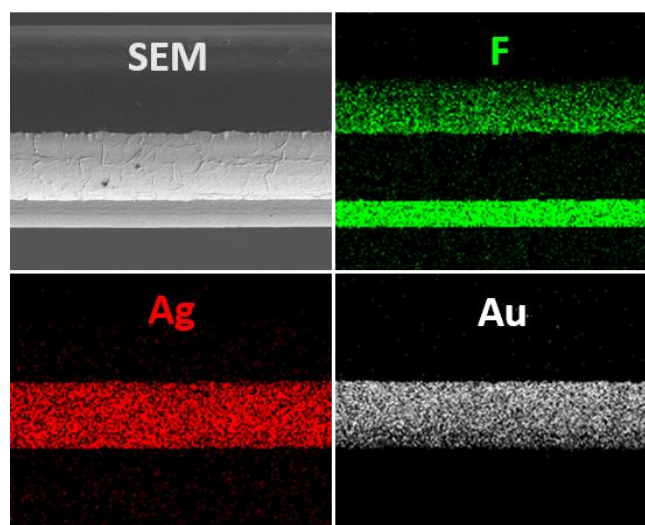

**Figure S2.** Top-view EDS elemental maps of the AgNP/AgNW/Au-coated fiber.

## Comparison of AgNP and AgNP/AgNW layers

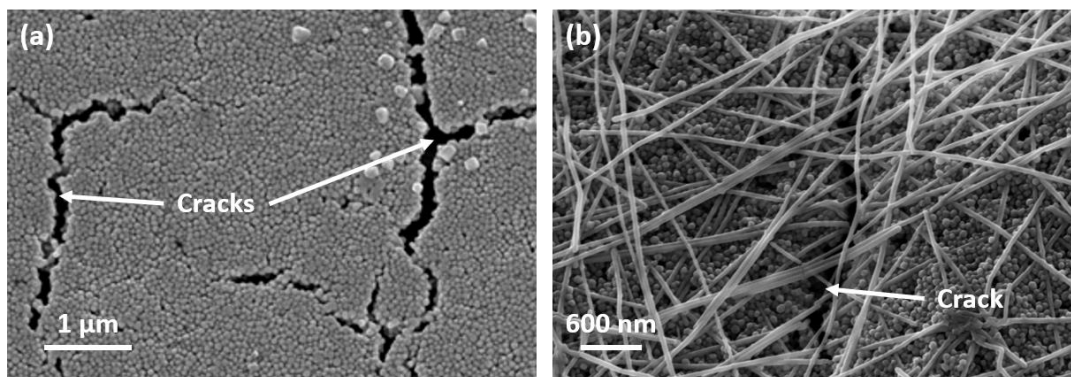

**Figure S3.** Top-view SEM images of (a) a AgNP layer and (b) a AgNP/AgNW layer near cracks.

## Electrochemical characteristics of G-SCs and MG-SCs

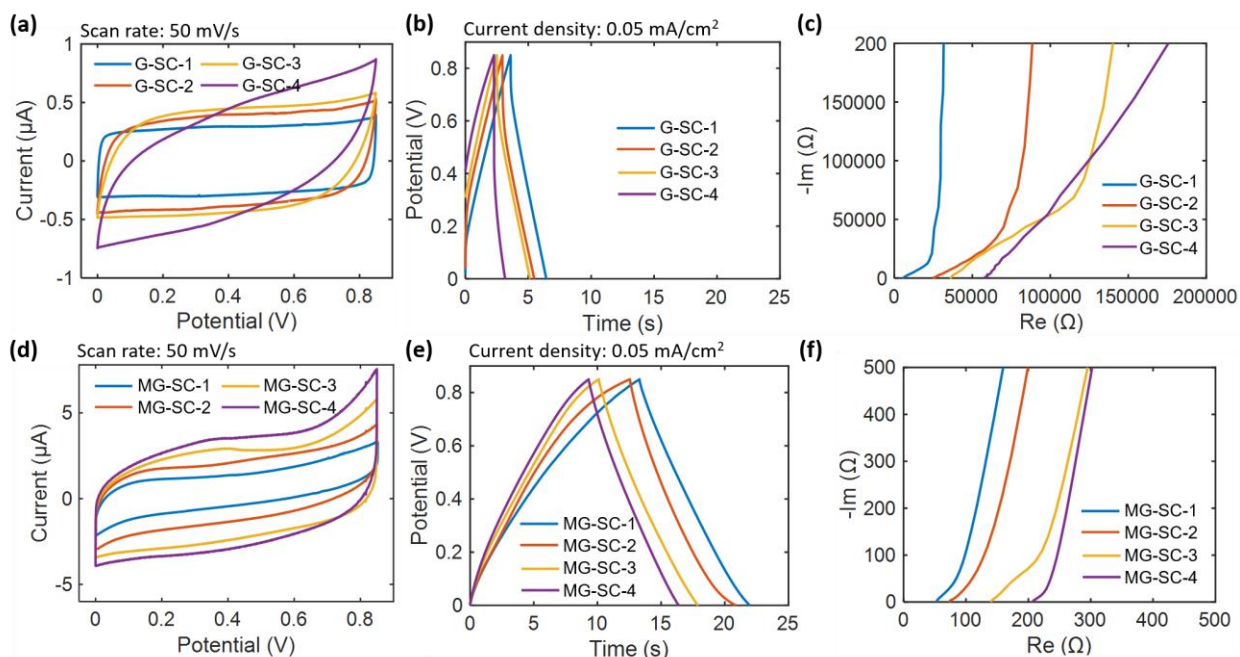

**Figure S4.** Cyclic voltammetry (CV) , galvanostatic charge/discharge (CC) curve, and electrochemical impedance spectroscopy (EIS) for (a, b, c) G-SCs and (c, d, e) MG-SCs, respectively.

## EDX and XPS of MnO<sub>2</sub>

Figure S5a shows the energy-dispersive X-ray spectroscopy (EDX; Emax Energy EX-250, Horiba) result of an MGM fiber electrode. The EDX spectrum confirms the existence of Mn and O in the electrode. Figure S5b shows the X-ray photoelectron spectroscopy (XPS; K-alpha Plus, Thermo Fisher Scientific) spectrum collected by the survey scan of a MnO<sub>2</sub> layer that was prepared on a large-area graphene film by using the same electrodeposition method. Figure S5c shows the XPS spectrum of Mn 2p that displays a peak separation of 11.6 eV.

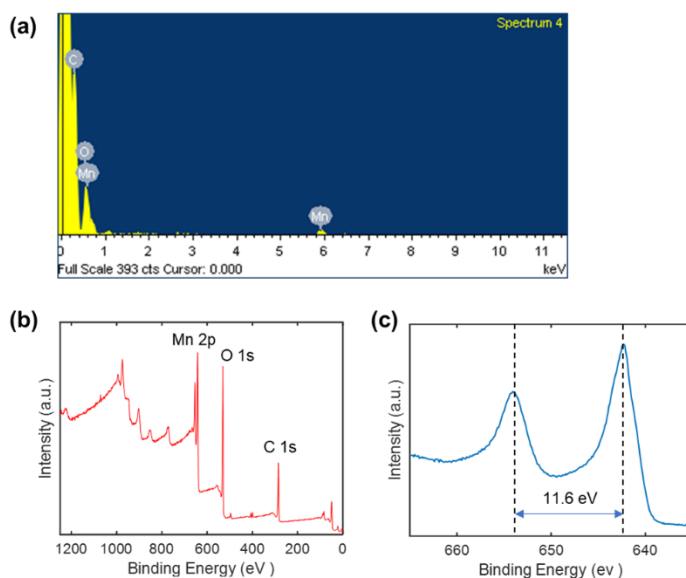

**Figure S5.** (a) EDX spectrum of an MGM electrode fiber. (b) Survey XPS spectrum and (c) XPS spectrum of Mn 2p that were obtained from a MnO<sub>2</sub> layer that was electrodeposited on a graphene film.

## Electrochemical characteristics of MGM-SC obtained via 3-electrode measurements

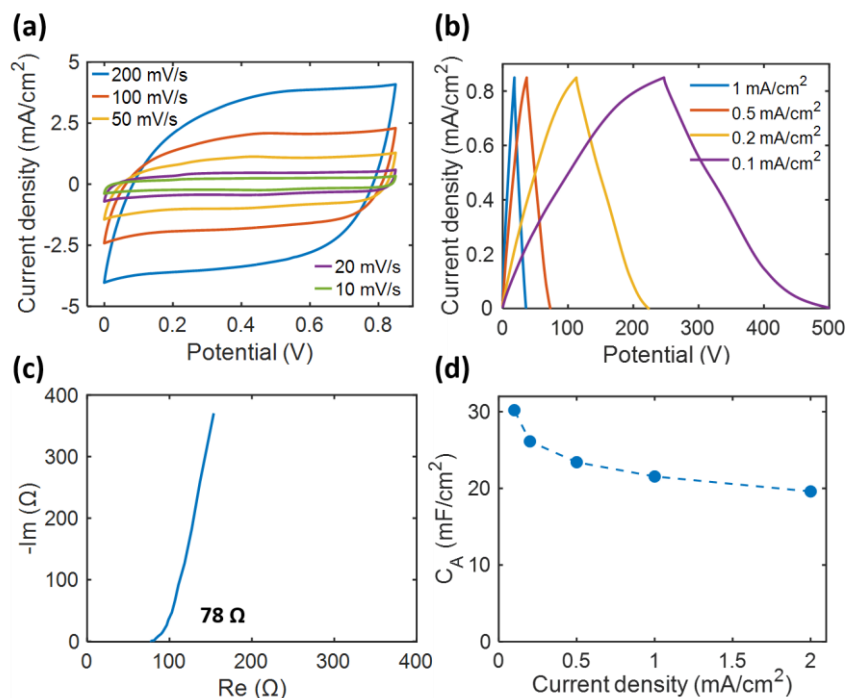

**Figure S6.** (a) CV , (b) CC , (c) EIS , and (d) areal capacitances at a range of current densities for a single MGM fiber (length: 3.5 cm).

## Cyclic charge/discharge testing for MGM-SC

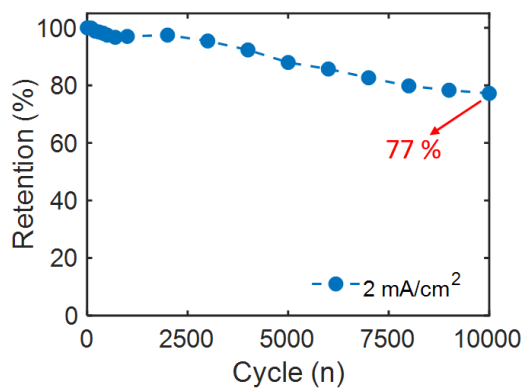

**Figure S7.** Capacitance retention for 10000 cycles of charge/discharge for MGM-SC.

## Ragone plot

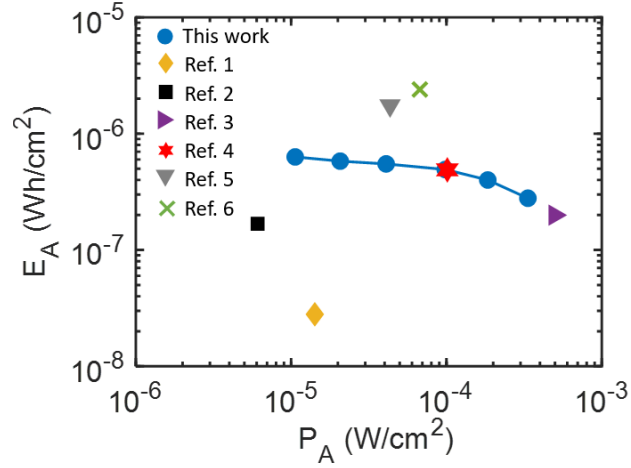

**Figure S8.** Area-specific Ragone plot of the MGM-SC and other reported fiber SCs. For comparison the data from ref. 1, 2, 3, 4, 5, 6 were reproduced by using Origin® software.

The areal energy density ( $E_A$ ) and power density ( $P_A$ ) in this work and ref. 4 and 6 were calculated by:

$$C_{cell} = \frac{I \times t}{(V - IR_{drop})} \quad (F) \quad (1)$$

$$E_A = \frac{1}{2} \times \frac{C_{cell}}{2A} \times \frac{V^2}{3600} \quad (Wh/cm^2) \quad (2)$$

$$P_A = \frac{E_A \times 3600}{t} \quad (W/cm^2) \quad (3)$$

, where  $I$  is the discharge current (A),  $t$  is the discharge time (s),  $V$  is the operation voltage (V),  $IR_{drop}$  is the voltage drop at the beginning of the discharge curve (V), and  $A$  is the surface area of a single fiber electrode (cm<sup>2</sup>).<sup>7, 8</sup> It should be noted that for ref. 2, the  $C_A$  and  $E_A$  values were calculated by

$$C_A = \frac{I}{A} \times \frac{t}{(V - IR_{drop})} \quad (4)$$

$$E_A = \frac{1}{2} \times C_A \times \frac{V^2}{3600} \quad (5)$$

### ***Stress-strain curve of the PVDF fiber***

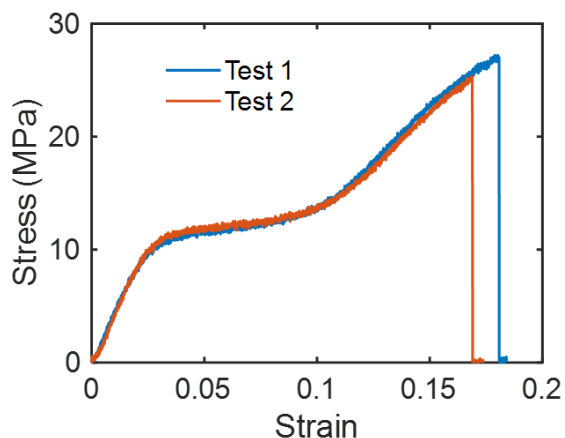

**Figure S9.** Stress-strain curve of the PVDF fiber.

### ***Droplet-coating method***

The AgNPs/AgNWs coated fiber was prepared by using the droplet-coating method. A Ag ink droplet, which was suspended to the syringe needle end, wetted part of the PVDF fiber, enveloping its entire cross-section. The syringe was then translated at a speed of 5 mm/s using a motorized linear stage, so that the droplet swept the entire surface of the fiber. This sweeping was repeated 10 times.

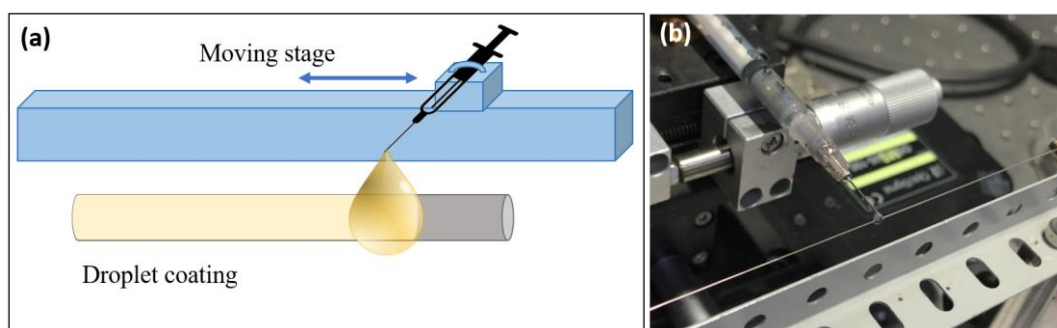

**Figure S10.** (a) Schematic of the droplet-coating method. (b) Digital image of the droplet-coating setup.

## Bendability comparison

**Table S1.** Bendability comparison of fiber SCs.

| Type                           | Material                                         | Diameter ( $\mu\text{m}$ )  | Bending angle ( $^\circ$ ) | Bending radius (cm) | Bending times (n) | Retention (%) | ref       |
|--------------------------------|--------------------------------------------------|-----------------------------|----------------------------|---------------------|-------------------|---------------|-----------|
| <b>All-in-one Monofilament</b> | PVDF fiber, thin metal layer, Gr, $\text{MnO}_2$ | SC device fiber: 320–340    | 180                        | 1.5–0.25            | -                 | 92.5          | This work |
|                                |                                                  |                             | 150                        | 0.75                | 3000              | 94            |           |
|                                | GO fiber, rGO                                    | SC device fiber: 50         | -                          | 0.75                | 160               | ~80           | 9         |
| <b>Parallel</b>                | Au coated polymer fiber + ink                    | Single electrode fiber: 200 | 180, 360                   | -                   | -                 | 95            | 10        |
|                                | Gr based functional fiber                        | Single electrode fiber: ~50 | 0–180                      | -                   | -                 | 120           | 8         |
|                                |                                                  |                             | 180                        | -                   | 1000              | 90            |           |
|                                | Cu wire /rGO/ $\text{MnO}_2$                     | Single electrode fiber: 150 | 60                         | -                   | 5000              | 80            | 11        |
|                                | CNT fiber/CNTs/ PANI                             | Single electrode fiber: 55  | 0–180                      | -                   | -                 | 95            | 12        |
|                                |                                                  |                             | 180                        | -                   | 500               | 99.8          |           |
|                                | rGO on Au wire                                   | Single electrode fiber: 130 | 0-120, S shape             | -                   | -                 | 99            | 13        |
|                                |                                                  |                             | 90                         | -                   | 1000              | 90            |           |
|                                | Hollow Gr/ conducting polymer fiber              | Single electrode fiber: 112 | 0–180                      | -                   | -                 | 105           | 14        |
|                                |                                                  |                             | 180                        | -                   | 500               | 95            |           |
| $\text{MnO}_2$ /porous Ni wire | Single electrode fiber: 300                      | 0-180                       | -                          | -                   | 90                | 15            |           |
| All-carbon hybrid fibers       | Single electrode fiber: 30                       | 120                         | -                          | 1000                | 96                | 16            |           |
|                                |                                                  | Single electrode fiber: 236 | 120                        | -                   | 1000              |               | 89        |
| <b>Twisted</b>                 | MWCNT/ OMC fiber                                 | Single electrode fiber: 150 | 180                        | -                   | 1000              | 90            | 5         |
|                                | rGO fiber                                        | SC device fiber: 500        | 0–360, intertwined         | -                   | -                 | 90            | 17        |
|                                |                                                  |                             | 180                        | -                   | 1000              | 90            |           |
|                                | SWCNTs/ PANiNW/gel yarn                          | Single electrode fiber: ~50 | 0–180                      | -                   | -                 | 95            | 4         |
| GF@PEDOT                       | Single electrode fiber: 90                       | 0–250                       | -                          | -                   | 90                | 18            |           |
|                                |                                                  | 180                         | -                          | 300                 | 80                |               |           |
| <b>Coaxial</b>                 | GF/Gr sheath                                     | SC device fiber: ~190       | 180                        | -                   | 100               | 92            | 19        |

Gr: graphene, GF: graphene fiber, rGO: reduced graphene oxide, CNT: carbon nanotube, PANI: polyaniline, MWCNT: multi-walled carbon nanotube, SWCNT: single-walled carbon nanotube, PaniNW: polyaniline nanowires, OMC: ordered mesoporous carbon, PEDOT: Poly(3,4-ethylenedioxythiophene).



## Specific capacitance comparison

**Table S2.** Comparison of specific capacitances of fiber SCs.

| Type         | Material                              | Electrolyte                                       | C <sub>L</sub><br>(mF/cm)                 | C <sub>A</sub><br>(mF/cm <sup>2</sup> )                                         | Ref       |
|--------------|---------------------------------------|---------------------------------------------------|-------------------------------------------|---------------------------------------------------------------------------------|-----------|
| Monofilament | PVDF fiber, Ag/Au/Gr/MnO <sub>2</sub> | PVA-Na <sub>2</sub> SO <sub>4</sub>               | <b>0.51</b> at 0.1 mA/cm <sup>2</sup>     | <b>12.3</b> at 0.1 mA/cm <sup>2</sup> *<br><b>9.5</b> at 2 mA/cm <sup>2</sup> * | This work |
|              | GO fiber, rGO                         | BMIMBF <sub>4</sub>                               | -                                         | <b>1.2</b> at 80 μA/cm <sup>2</sup>                                             | 9         |
|              |                                       | 0.1 M NaClO <sub>4</sub><br>in CH <sub>3</sub> CN | -                                         | <b>0.24</b> at 200 μA/cm <sup>2</sup>                                           |           |
| Parallel     | Gr based functional fiber             | PVA-H <sub>2</sub> SO <sub>4</sub>                | -                                         | <b>74.25</b> at 40 mV/s *                                                       | 8         |
|              | Cu/rGO/MnO <sub>2</sub>               | PVA-KOH                                           | -                                         | <b>140</b> at 0.1 mA/cm <sup>2</sup>                                            | 11        |
|              | CNT fiber/CNT/PANI                    | PVA-H <sub>3</sub> PO <sub>4</sub>                | -                                         | <b>67.31</b> at 0.5 mA/cm <sup>2</sup>                                          | 12        |
|              | MnO <sub>2</sub> /porous Ni wire      | PVA-KOH                                           | -                                         | <b>847.22</b> at 0.41 mA/cm <sup>2</sup>                                        | 15        |
| Twisted      | GF/MnO <sub>2</sub>                   | PVA-H <sub>2</sub> SO <sub>4</sub>                | <b>0.143</b> at 100 mV/s                  | <b>9.1–9.6</b> at 2 μA                                                          | 20        |
|              | Gr/conducting polymer<br>microfibers  | PVA-H <sub>2</sub> SO <sub>4</sub>                | <b>0.58</b><br>at 0.53 mA/cm <sup>2</sup> | <b>15.39</b> at 0.53 mA/cm <sup>2</sup>                                         | 18        |
|              | SWCNTs/<br>PAniNW/gel yarn            | PVA-H <sub>2</sub> SO <sub>4</sub>                | -                                         | <b>3.065</b> at 0.2 A/g *                                                       | 4         |
| Coaxial      | Stainless steel, ink, AC              | PVA-H <sub>3</sub> PO <sub>4</sub>                | <b>0.1</b> at 40 μA                       | <b>3.18</b> 40 μA                                                               | 21        |
|              | Nanoporous Au wire, MnO <sub>2</sub>  | PVA-LiCl                                          | -                                         | <b>12</b> at 0.3 mA/cm <sup>2</sup><br><b>6</b> at 2 mA/cm <sup>2</sup>         | 22        |

Gr: graphene, GF: graphene fiber, GO: graphene oxide, rGO: reduced graphene oxide, CNT: carbon nanotube, SWCNT: single-walled carbon nanotube, PaniNW: polyaniline nanowires, NW: nanowire.

\* The specific capacitance values reported in this paper, ref. 8 and ref. 4 were calculated from the equation:

$$C_X = 2 \frac{I}{X} \times \frac{t}{(V - IR_{\text{drop}})} \quad (6)$$

, where I is the discharge current (A), t is the discharge time (s), V is the operation voltage (V), and IR<sub>drop</sub> is the voltage drop at the beginning of the discharge curve (V). X can be the effective surface area (A) or length (L) of a single electrode. However, other studies in the table reported the specific capacitance value from the following equation:

$$C_X = \frac{I}{X} \times \frac{t}{(V - IR_{\text{drop}})} \quad (7)$$

Therefore, the specific capacitance value reported in the marked papers has been divided by a factor of 2 in this table for fair comparison.

## References

1. J. Bae, M. K. Song, Y. J. Park, J. M. Kim, M. Liu and Z. L. Wang, *Angew. Chem. Int. Ed. Engl.*, 2011, **50**, 1683-1687.
2. Y. Meng, Y. Zhao, C. Hu, H. Cheng, Y. Hu, Z. Zhang, G. Shi and L. Qu, *Adv. Mater.*, 2013, **25**, 2326-2331.
3. P. Xu, T. Gu, Z. Cao, B. Wei, J. Yu, F. Li, J.-H. Byun, W. Lu, Q. Li and T.-W. Chou, *Advanced Energy Materials*, 2014, **4**.
4. Q. Meng, K. Wang, W. Guo, J. Fang, Z. Wei and X. She, *Small*, 2014, **10**, 3187-3193.
5. J. Ren, W. Bai, G. Guan, Y. Zhang and H. Peng, *Adv. Mater.*, 2013, **25**, 5965-5970.
6. C. Choi, S. H. Kim, H. J. Sim, J. A. Lee, A. Y. Choi, Y. T. Kim, X. Lepro, G. M. Spinks, R. H. Baughman and S. J. Kim, *Sci Rep*, 2015, **5**, 9387.
7. D. Yu, Q. Qian, L. Wei, W. Jiang, K. Goh, J. Wei, J. Zhang and Y. Chen, *Chem Soc Rev*, 2015, **44**, 647-662.
8. N. He, W. Shan, J. Wang, Q. Pan, J. Qu, G. Wang and W. Gao, *J. Mater. Chem. A*, 2019, **7**, 6869-6876.
9. Y. Hu, H. Cheng, F. Zhao, N. Chen, L. Jiang, Z. Feng and L. Qu, *Nanoscale*, 2014, **6**, 6448-6451.
10. Y. Fu, X. Cai, H. Wu, Z. Lv, S. Hou, M. Peng, X. Yu and D. Zou, *Adv. Mater.*, 2012, **24**, 5713-5718.
11. M. Huang, L. Wang, S. Chen, L. Kang, Z. Lei, F. Shi, H. Xu and Z.-H. Liu, *Rsc Adv*, 2017, **7**, 10092-10099.
12. J.-h. Liu, X.-y. Xu, W. Lu, X. Xiong, X. Ouyang, C. Zhao, F. Wang, S.-y. Qin, J.-l. Hong, J.-n. Tang and D.-Z. Chen, *Electrochim. Acta*, 2018, **283**, 366-373.
13. Y. Li, K. Sheng, W. Yuan and G. Shi, *Chem Commun (Camb)*, 2013, **49**, 291-293.
14. G. Qu, J. Cheng, X. Li, D. Yuan, P. Chen, X. Chen, B. Wang and H. Peng, *Adv. Mater.*, 2016, **28**, 3646-3652.
15. P. Li, J. Li, Z. Zhao, Z. Fang, M. Yang, Z. Yuan, Y. Zhang, Q. Zhang, W. Hong, X. Chen and D. Yu, *Adv Sci (Weinh)*, 2017, **4**, 1700003.
16. W. Jiang, S. Zhai, Q. Qian, Y. Yuan, H. E. Karahan, L. Wei, K. Goh, A. K. Ng, J. Wei and Y. Chen, *Energy & Environmental Science*, 2016, **9**, 611-622.
17. N. He, J. Liao, F. Zhao and W. Gao, *ACS Appl Mater Interfaces*, 2020, **12**, 15211-15219.
18. Y. Meng, L. Jin, B. Cai and Z. Wang, *Rsc Adv*, 2017, **7**, 38187-38192.
19. X. Zhao, B. Zheng, T. Huang and C. Gao, *Nanoscale*, 2015, **7**, 9399-9404.
20. Q. Chen, Y. Meng, C. Hu, Y. Zhao, H. Shao, N. Chen and L. Qu, *J. Power Sources*, 2014, **247**, 32-39.
21. D. Harrison, F. Qiu, J. Fyson, Y. Xu, P. Evans and D. Southee, *Phys. Chem. Chem. Phys.*, 2013, **15**, 12215-12219.
22. H. Xu, X. Hu, Y. Sun, H. Yang, X. Liu and Y. Huang, *Nano Research*, 2014, **8**, 1148-1158.
